# Supplementary material
Source: PubMed Central journal article supplement (PMC11072268)
Supplement: 18_2023_5016_MOESM1_ESM.pdf [file 18_2023_5016_MOESM1_ESM.pdf]

**Supplementary Materials** for the manuscript

**BK channels sustain neuronal Ca<sup>2+</sup> oscillations to support hippocampal long-term potentiation and memory formation in mice**

Thomas Pham<sup>1</sup>, Tamara Hussein<sup>1</sup>, Dila Calis<sup>2</sup>, Helmut Bischof<sup>1</sup>, David Skrabak<sup>1</sup>, Melanie Cruz Santos<sup>1</sup>, Selina Maier<sup>1</sup>, David Spähn<sup>1</sup>, Daniel Kalina<sup>1</sup>, Stefanie Simonsig<sup>1</sup>, Rebekka Ehinger<sup>1</sup>, Bernhard Groschup<sup>3</sup>, Marlies Knipper<sup>2</sup>, Nikolaus Plesnila<sup>3,4</sup>, Peter Ruth<sup>1</sup>, Robert Lukowski<sup>1,§</sup>, Lucas Matt<sup>1,5,§</sup>

<sup>1</sup>Department of Pharmacology, Toxicology and Clinical Pharmacy, Institute of Pharmacy, University of Tübingen, Tübingen, Germany

<sup>2</sup>Department of Otolaryngology, Head and Neck Surgery, Molecular Physiology of Hearing, Tübingen Hearing Research Centre, University of Tübingen, Tübingen, Germany

<sup>3</sup>Laboratory of Experimental Stroke Research, Institute for Stroke and Dementia Research (ISD), University Hospital, Ludwig-Maximilians-University Munich (LMU), Munich, Germany

<sup>4</sup>Munich Cluster for Systems Neurology (SyNergy), Munich, Germany

<sup>5</sup>Lead contact

<sup>§</sup>These authors equally contributed to the study

**Correspondence:** Lucas Matt, email: lucas.matt@uni-tuebingen.de.

## SUPPLEMENTAL TABLES

Table S1. Values and statistics for Figure 1.

| Panel          |                 |                            |                          |                   |                                                       |                 |    |                                       |
|----------------|-----------------|----------------------------|--------------------------|-------------------|-------------------------------------------------------|-----------------|----|---------------------------------------|
| <b>B</b>       | <b>genotype</b> | <b>relative expression</b> | <b>n</b>                 | <b>statistics</b> | <b>p</b>                                              |                 |    |                                       |
|                | CTRL            | 0.258 ± 0.015              | 3                        | unpaired t-test   | 0.045 vs. CTRL                                        |                 |    |                                       |
|                | cKO             | 0.200 ± 0.014              | 3                        |                   |                                                       |                 |    |                                       |
| <b>D</b>       | <b>genotype</b> | <b>time in center (%)</b>  | <b>n</b>                 | <b>statistics</b> | <b>p</b>                                              |                 |    |                                       |
|                | CTRL            | 17.49 ± 2.42               | 14                       | unpaired t-test   | 0.75 vs. CTRL                                         |                 |    |                                       |
|                | cKO             | 18.37 ± 1.35               | 14                       |                   |                                                       |                 |    |                                       |
| <b>E</b>       | <b>genotype</b> | <b>rearrings</b>           | <b>n</b>                 | <b>statistics</b> | <b>p</b>                                              |                 |    |                                       |
|                | CTRL            | 51.36 ± 7.780              | 14                       | unpaired t-test   | 0.39 vs. CTRL                                         |                 |    |                                       |
|                | cKO             | 44.07 ± 3.427              | 15                       |                   |                                                       |                 |    |                                       |
| <b>F</b>       | <b>genotype</b> | <b>total distance (m)</b>  | <b>n</b>                 | <b>statistics</b> | <b>p</b>                                              |                 |    |                                       |
|                | CTRL            | 173.0 ± 12.02              | 14                       | unpaired t-test   | 0.15 vs. CTRL                                         |                 |    |                                       |
|                | cKO             | 198.9 ± 12.43              | 15                       |                   |                                                       |                 |    |                                       |
| <b>G</b>       | <b>genotype</b> | <b>mean speed (cm/s)</b>   | <b>n</b>                 | <b>statistics</b> | <b>p</b>                                              |                 |    |                                       |
|                | CTRL            | 9.614 ± 0.668              | 14                       | unpaired t-test   | 0.13 vs. CTRL                                         |                 |    |                                       |
|                | cKO             | 11.10 ± 0.672              | 15                       |                   |                                                       |                 |    |                                       |
| <b>H</b>       | <b>genotype</b> | <b>beam</b>                | <b>falls per trial</b>   | <b>n</b>          | <b>statistics</b>                                     | <b>p</b>        |    |                                       |
|                |                 | CTRL                       | square                   | 0.144 ± 0.038     |                                                       |                 | 15 | F <sub>1,354</sub> = 0.14<br>p = 0.70 |
|                |                 |                            | round                    | 0.100 ± 0.051     |                                                       |                 | 15 |                                       |
|                | square & round  |                            | 0.122 ± 0.030            | 15                |                                                       |                 |    |                                       |
|                | cKO             | square                     | 0.144 ± 0.048            | 15                | 2-way ANOVA<br>with Sidak's<br>multiple<br>comparison | 0.98 vs. CTRL   |    |                                       |
|                |                 | round                      | 0.100 ± 0.048            | 15                |                                                       | 0.84 vs. CTRL   |    |                                       |
| square & round |                 | 0.122 ± 0.032              | 15                       | 0.997 vs. CTRL    |                                                       |                 |    |                                       |
| <b>I</b>       | <b>genotype</b> | <b>beam</b>                | <b>slips per trial</b>   | <b>n</b>          | <b>statistics</b>                                     | <b>p</b>        |    |                                       |
|                |                 | CTRL                       | square                   | 0.281 ± 0.038     |                                                       |                 | 12 | F <sub>1,180</sub> = 0.18<br>p = 0.68 |
|                |                 |                            | round                    | 0.306 ± 0.082     |                                                       |                 | 12 |                                       |
|                | square & round  |                            | 0.302 ± 0.046            | 12                |                                                       |                 |    |                                       |
|                | cKO             | square                     | 0.539 ± 0.082            | 14                | 2-way ANOVA<br>with Sidak's<br>multiple<br>comparison | 0.0092 vs. CTRL |    |                                       |
|                |                 | round                      | 0.147 ± 0.041            | 13                |                                                       | 0.19 vs. CTRL   |    |                                       |
| square & round |                 | 0.353 ± 0.047              | 14                       | 0.91 vs. CTRL     |                                                       |                 |    |                                       |
| <b>J</b>       | <b>genotype</b> | <b>beam</b>                | <b>latency per trial</b> | <b>n</b>          | <b>statistics</b>                                     | <b>p</b>        |    |                                       |
|                |                 | CTRL                       | square                   | 12.321 ± 1.517    |                                                       |                 | 14 | F <sub>1,290</sub> = 2.88<br>p = 0.09 |
|                |                 |                            | round                    | 9.601 ± 1.008     |                                                       |                 | 13 |                                       |
|                | square & round  |                            | 11.073 ± 0.937           | 14                |                                                       |                 |    |                                       |
|                | cKO             | square                     | 10.826 ± 1.751           | 14                | 2-way ANOVA<br>with Sidak's<br>multiple<br>comparison | 0.77 vs. CTRL   |    |                                       |
|                |                 | round                      | 8.631 ± 0.795            | 13                |                                                       | 0.93 vs. CTRL   |    |                                       |
| square & round |                 | 9.690 ± 0.947              | 14                       | 0.81 vs. CTRL     |                                                       |                 |    |                                       |

**Table S2. Values and statistics for Figure 2.**

| Panel    |                |                       |                         |                  |                                                                                         |                                              |               |
|----------|----------------|-----------------------|-------------------------|------------------|-----------------------------------------------------------------------------------------|----------------------------------------------|---------------|
| <b>A</b> | genotype       | days of training      | latency (s)             | n                | statistics                                                                              | p                                            |               |
|          | CTRL           | 1                     | 52.408 ± 1.795          | 20               | F <sub>1,234</sub> = 16.74<br>p < 0.001<br>2-way ANOVA with Sidak's multiple comparison |                                              |               |
|          | cKO            |                       | 54.171 ± 2.032          | 21               |                                                                                         | 0.0017 vs. CTRL                              |               |
|          | CTRL           | 2                     | 21.833 ± 2.246          | 20               |                                                                                         |                                              |               |
|          | cKO            |                       | 30.868 ± 3.281          | 21               |                                                                                         | 0.03 vs. CTRL                                |               |
|          | CTRL           | 3                     | 16.804 ± 2.025          | 20               |                                                                                         |                                              |               |
|          | cKO            |                       | 23.382 ± 3.116          | 21               |                                                                                         | 0.09 vs. CTRL                                |               |
|          | CTRL           | 4                     | 11.351 ± 1.244          | 20               |                                                                                         |                                              |               |
|          | cKO            |                       | 18.178 ± 2.522          | 21               |                                                                                         | 0.02 vs. CTRL                                |               |
|          | CTRL           | 5                     | 9.019 ± 0.651           | 20               |                                                                                         |                                              |               |
|          | cKO            |                       | 13.352 ± 1.831          | 21               |                                                                                         | 0.03 vs. CTRL                                |               |
|          | CTRL           | Probe                 | 9.919 ± 1.124           | 20               |                                                                                         |                                              |               |
| cKO      | 12.846 ± 2.796 |                       | 21                      | 0.57 vs. CTRL    |                                                                                         |                                              |               |
| <b>B</b> | genotype       | quadrant              | latency (s)             | n                | statistics                                                                              | p                                            |               |
|          | CTRL           | NE                    | 38.907 ± 2.630          | 20               | F <sub>1,156</sub> = 0.03<br>p = 0.85<br>2-way ANOVA with Sidak's multiple comparison   |                                              |               |
|          | cKO            |                       | 30.825 ± 1.875          | 21               |                                                                                         | 0.047 vs. CTRL                               |               |
|          | CTRL           | NW                    | 19.754 ± 1.617          | 20               |                                                                                         |                                              |               |
|          | cKO            |                       | 20.841 ± 1.701          | 21               |                                                                                         |                                              |               |
|          | CTRL           | SW                    | 15.864 ± 1.527          | 20               |                                                                                         |                                              | 0.03 vs. CTRL |
|          | cKO            |                       | 22.389 ± 1.669          | 21               |                                                                                         |                                              |               |
|          | CTRL           | SE                    | 21.411 ± 2.294          | 20               |                                                                                         |                                              |               |
| cKO      | 22.879 ± 1.827 |                       | 21                      |                  |                                                                                         |                                              |               |
| <b>E</b> | genotype       | swim speed (cm/s)     |                         | n                | statistics                                                                              | p                                            |               |
|          | CTRL           | 22.27 ± 0.52          |                         | 20               | unpaired t-test                                                                         |                                              |               |
|          | cKO            | 22.53 ± 0.59          |                         | 21               |                                                                                         | 0.65 vs. CTRL                                |               |
| <b>F</b> | genotype       | baseline (%-baseline) | stimulated (%-baseline) | n (slice/animal) | statistics                                                                              | p                                            |               |
|          | CTRL           | 100.8 ± 0.40          | 138.61 ± 8.21           | 7 / 4            | F <sub>1,195</sub> = 83.31<br>p < 0.0001                                                | 0.0037 vs. Baseline (paired t-test)          |               |
|          | cKO            | 99.30 ± 0.78          | 109.90 ± 8.00           | 8 / 4            |                                                                                         | 0.1986 vs. Baseline (paired t-test)          |               |
|          |                |                       |                         |                  | 2-way ANOVA                                                                             | 0.0267 vs. stimulated CTRL (unpaired t-test) |               |
| <b>G</b> | genotype       | baseline (%-baseline) | stimulated (%-baseline) | n (slice/animal) | statistics                                                                              | p                                            |               |
|          | CTRL           | 101.1 ± 0.75          | 207.3 ± 31.86           | 10 / 4           | F <sub>1,276</sub> = 72.41<br>p < 0.0001                                                | 0.0089 vs. Baseline (paired t-test)          |               |
|          | cKO            | 104.7 ± 1.18          | 134.5 ± 8.86            | 10 / 5           |                                                                                         | 0.0084 vs. Baseline (paired t-test)          |               |
|          |                |                       |                         |                  | 2-way ANOVA                                                                             | 0.0410 vs. stimulated CTRL (unpaired t-test) |               |

**Table S3. Values and statistics for Figure 3.**

| Panel     |               |                           |               |   |                                              |                          |
|-----------|---------------|---------------------------|---------------|---|----------------------------------------------|--------------------------|
| <b>A</b>  | genotype      | stimulated / unstimulated | pS845 / GluA1 | n | statistics                                   | p                        |
|           | CTRL          | unstimulated              | 1.000 ± 0.223 | 4 | F <sub>1,11</sub> = 31.85<br>p < 0.0002      | 0.0006 vs. unstim. CTRL  |
|           | cKO           |                           | 1.250 ± 0.141 | 4 |                                              |                          |
|           | CTRL          | stimulated                | 4.376 ± 0.772 | 3 | 2-way ANOVA with Sidak's multiple comparison | 0.02 vs. stim. CTRL      |
| cKO       | 2.216 ± 0.365 |                           | 4             |   |                                              |                          |
| <b>B</b>  | genotype      | stimulated / unstimulated | pS831 / GluA1 | n | statistics                                   | p                        |
|           | CTRL          | unstimulated              | 1.216 ± 0.170 | 4 | F <sub>1,12</sub> = 0.002<br>p = 0.97        | >0.99 vs. unstim. CTRL   |
|           | cKO           |                           | 1.000 ± 0.344 | 4 |                                              |                          |
|           | CTRL          | stimulated                | 1.120 ± 0.363 | 4 | 2-way ANOVA with Sidak's multiple comparison | >0.9999 vs. stim. CTRL   |
| cKO       | 1.069 ± 0.334 |                           | 4             |   |                                              |                          |
| <b>C</b>  | genotype      | stimulated / unstimulated | pS845 / GluA1 | n | statistics                                   | p                        |
|           | CTRL x PAX    | unstimulated              | 1.000 ± 0.294 | 3 | F <sub>1,8</sub> = 0.17<br>p = 0.69          | 0.9972 vs. unstim. CTRL  |
|           | cKO x PAX     |                           | 0.848 ± 0.215 | 3 |                                              |                          |
|           | CTRL x PAX    | stimulated                | 0.827 ± 0.220 | 3 | 2-way ANOVA with Sidak's multiple comparison | 0.8649 vs. stim. CTRL    |
| cKO x PAX | 1.218 ± 0.225 |                           | 3             |   |                                              |                          |
| <b>D</b>  | genotype      | stimulated / unstimulated | pS831 / GluA1 | n | statistics                                   | p                        |
|           | CTRL x PAX    | unstimulated              | 1.000 ± 0.700 | 3 | F <sub>1,8</sub> = 0.04<br>p = 0.86          | >0.9999 vs. unstim. CTRL |
|           | cKO x PAX     |                           | 0.962 ± 0.803 | 3 |                                              |                          |
|           | CTRL x PAX    | stimulated                | 0.766 ± 0.452 | 3 | 2-way ANOVA with Sidak's multiple comparison | >0.9999 vs. stim. CTRL   |
| cKO x PAX | 0.953 ± 0.581 |                           | 3             |   |                                              |                          |

**Table S4. Values and statistics for Figure 4.**

| Panel | condition         | $R/R^0_{\text{FRET/CFP}}$ | n  | statistics                                              | p                            |
|-------|-------------------|---------------------------|----|---------------------------------------------------------|------------------------------|
| H     | BK <sup>+/+</sup> | 0.161 ± 0.021             | 11 | $F_{4,42} = 4.28$                                       |                              |
|       | BK <sup>-/-</sup> | 0.034 ± 0.005             | 11 | p < 0.005                                               | <0.001 vs. BK <sup>+/+</sup> |
|       | PAX               | 0.019 ± 0.005             | 10 |                                                         | <0.001 vs. BK <sup>+/+</sup> |
|       | AP5               | 0.080 ± 0.010             | 9  | 2-way ANOVA<br>with Dunnett's<br>multiple<br>comparison | <0.001 vs. BK <sup>+/+</sup> |
|       | NIFE              | 0.090 ± 0.008             | 6  |                                                         | 0.002 vs. BK <sup>+/+</sup>  |

**Table S5. Values and statistics for Figure 5.**

| Panel | stimulated / unstimulated | cond. | R/R <sup>0</sup> <sub>FRET/CFP</sub> | n | statistics                                                                                   | p                         |
|-------|---------------------------|-------|--------------------------------------|---|----------------------------------------------------------------------------------------------|---------------------------|
| F     | unstimulated              | CTRL  | 0.6232 ± 0.059                       | 4 | F <sub>5,23</sub> = 2.52<br><br>p = 0.06<br><br>1-way ANOVA with Tukey's multiple comparison |                           |
|       |                           | KO    | 0 ± 0                                | 4 |                                                                                              |                           |
|       |                           | PAX   | 0.4278 ± 0.027                       | 4 |                                                                                              |                           |
|       |                           | AP5   | 0.2071 ± 0.007                       | 4 |                                                                                              |                           |
|       |                           | NIFE  | 0.3498 ± 0.062                       | 9 |                                                                                              |                           |
|       | stimulated                | CTRL  | 1.099 ± 0.111                        | 4 | F <sub>9,39</sub> = 2.71<br><br>p < 0.01<br><br>1-way ANOVA with Tukey's multiple comparison | <0.0001 vs. CTRL baseline |
|       |                           | KO    | 0.3967 ± 0.063                       | 4 |                                                                                              | <0.0001 vs. CTRL cLTP     |
|       |                           | PAX   | 0.2603 ± 0.016                       | 4 |                                                                                              | <0.0001 vs. CTRL cLTP     |
|       |                           | AP5   | 0.2089 ± 0.058                       | 3 |                                                                                              | <0.0001 vs. CTRL cLTP     |
|       |                           | NIFE  | 0.1659 ± 0.014                       | 9 |                                                                                              | <0.0001 vs. CTRL cLTP     |

**Table S6. Oligonucleotides used in this study.**

| <b>genotyping</b> |               |                             |
|-------------------|---------------|-----------------------------|
|                   | <b>primer</b> | <b>sequence 5' to 3'</b>    |
| <b>BK</b>         | for1          | TGG TCT TCT TCA TCC TCG GG  |
|                   | for2          | AAG GGC CAT TTT GAA GAC GTC |
|                   | rev           | CCA GCC ACG TGT TTG TTG G   |
| <b>T29.1-Cre</b>  | for           | CGT CCA TCT GGT CAG AAA AG  |
|                   | rev           | TCT TCT TCT TGG GCA TGG TC  |

**Table S7. Primary antibody information.**

| Target                 | Source         | Catalog # | Species / Isotype | Figure   |
|------------------------|----------------|-----------|-------------------|----------|
| BK $\alpha$            | NeuroMab       | 75-022    | mouse IgG2a       | 1        |
| GluA1                  | Origene        | TA326534  | mouse IgG1        | 3        |
| GluA1 <sup>pS845</sup> | Millipore      | AB5849    | rabbit polyclonal | 3        |
| GluA1 <sup>pS831</sup> | Cell Signaling | 75574     | rabbit polyclonal | 3        |
| GluA2                  | Cell Signaling | 13607     | rabbit polyclonal | S3       |
| GluN1                  | Origene        | TA326536  | mouse IgG1        | S3       |
| GluN2A                 | Origene        | TA326537  | mouse IgG2a       | S3       |
| GluN2B                 | Cell Signaling | 14544     | rabbit polyclonal | S3       |
| $\alpha$ -Tubulin      | Cell Signaling | 3873      | mouse IgG1        | 1, 3, S3 |



## SUPPLEMENTAL FIGURES AND LEGENDS

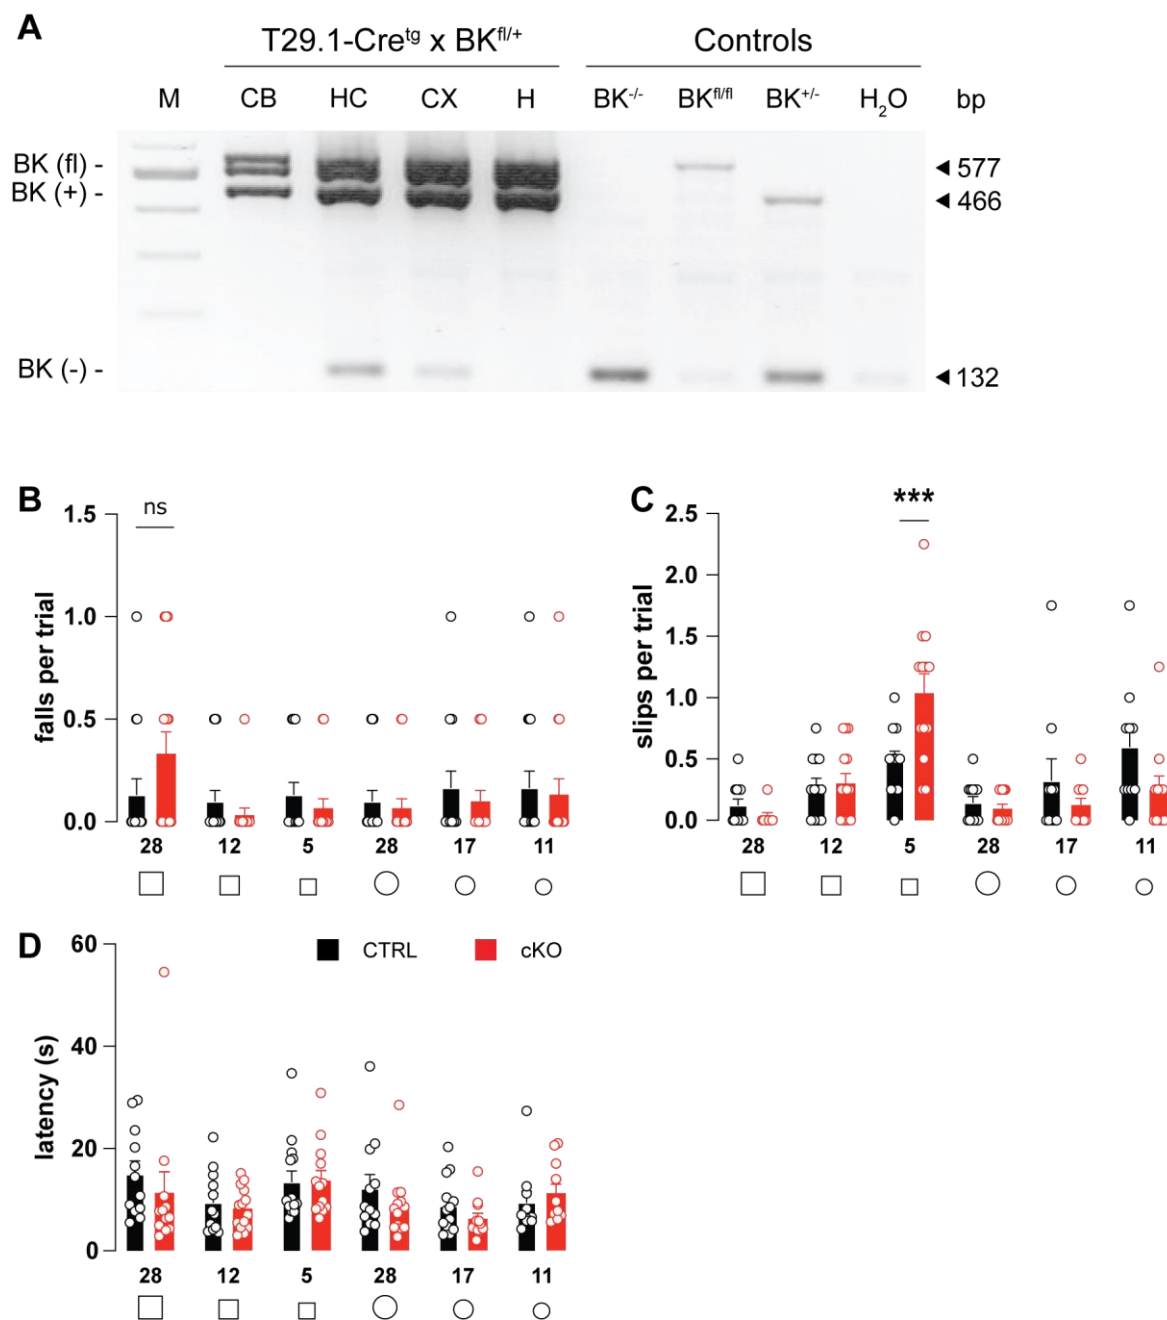

**Figure S1.** Conditional Cre recombination and beam walk test in cKO

(A) DNA isolated from indicated tissues of T29.1-Cre<sup>tg/+</sup>; BK<sup>fl/+</sup> was amplified by genotyping PCR and separated by agarose gel electrophoresis. As expected, the wildtype allele (+) was detected - at 466 bp. Recombination of the floxed allele ([fl], 577 bp) into the recombined null allele ([-], 132 bp) is prominently observed in hippocampus (HC) and faintly in cortex (CX). No recombination is observed in cerebellum (CB) and heart (H). Tissue from BK<sup>-/-</sup>, BK<sup>fl/fl</sup>, BK<sup>+/-</sup> as

well as water (H<sub>2</sub>O) served as internal controls. n = 3 independent experiments from N = 3 animals.

**(B-D)** Results of the beam walk test for indicated individual beam shapes and sizes. **(B)** Falls per trial (N = 15 animals), **(C)** slips per trial (N = 8-14) and **(D)** latency to cross the beam (N = 11-14) did not differ between CTRL and cKO. An exception was the 5 mm square beam on which one individual subject had difficulties during its performance. N = 8-14. Statistics: Two-way ANOVA with Sidak's multiple comparison test. All bar diagrams presented as means ± SEM.

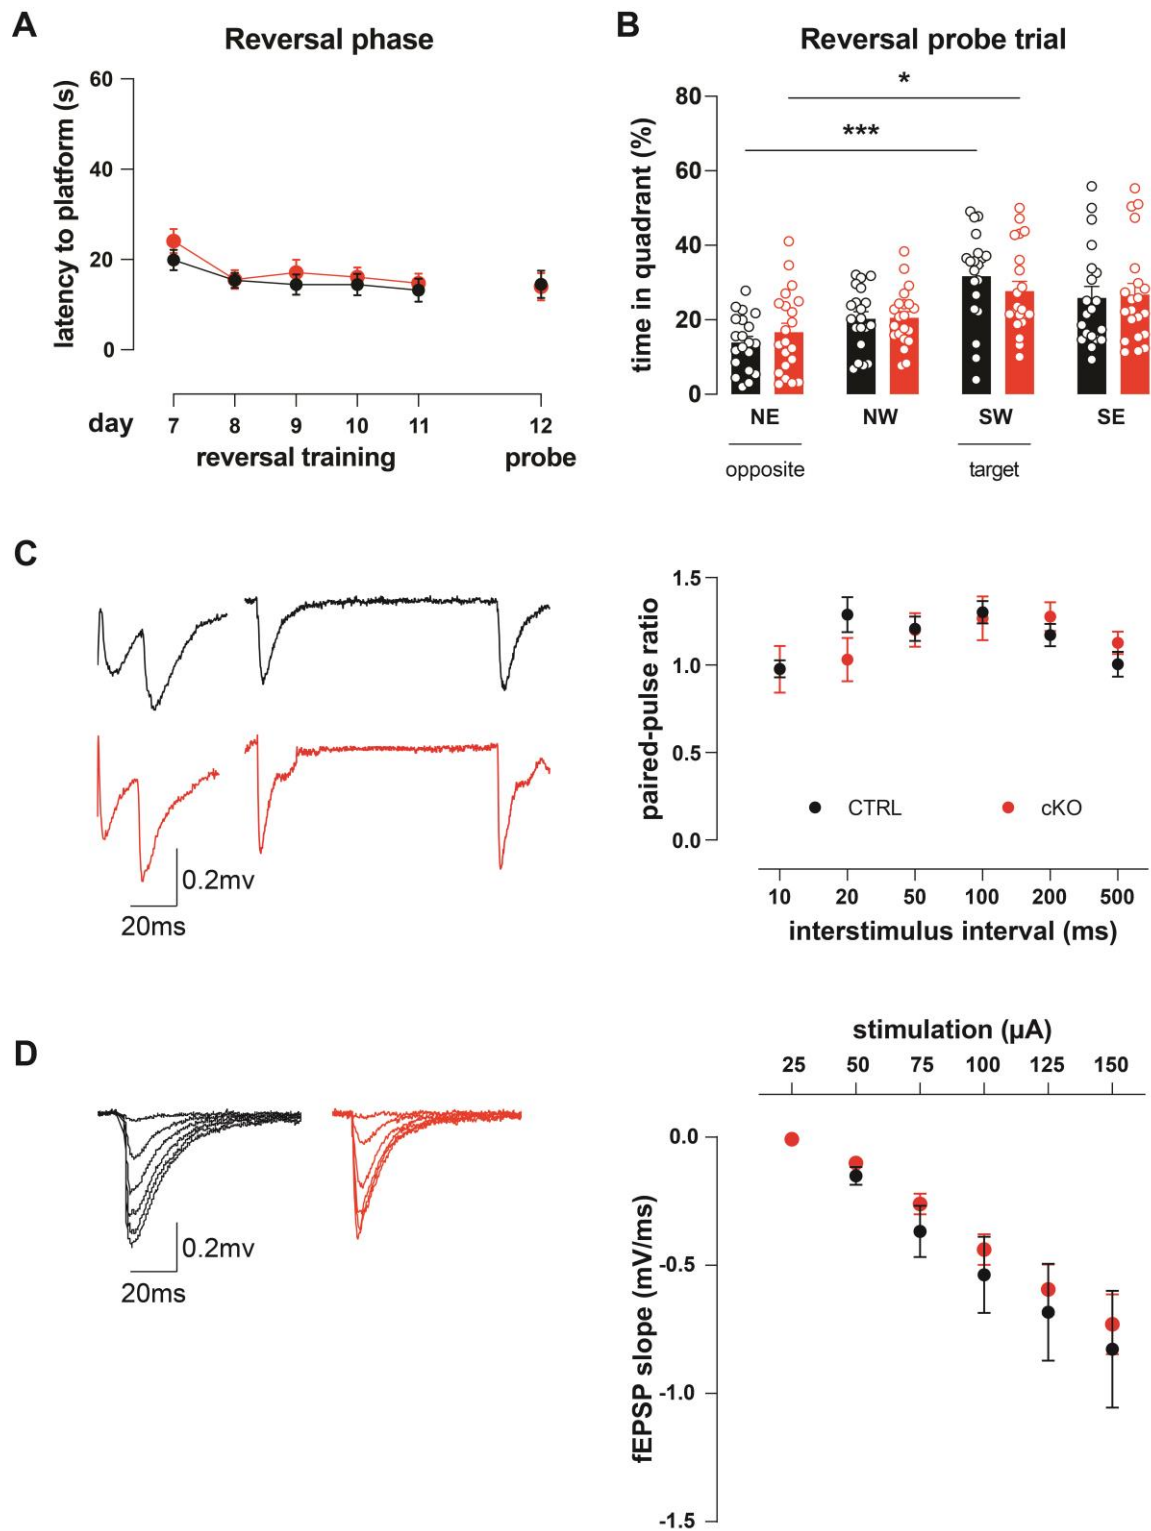

**Figure S2.** Normal reversal learning and basal synaptic transmission in *cKO*

(A-B) *cKO* display normal reversal learning in the MWM.

(A) Mean latencies to reach newly positioned hidden platform on 5 reversal training days (4 training sessions per day) and the reversal probe trial were not different between *cKO*

(N = 21 animals) and CTRL (N = 20). Since the hidden platform was removed, latency during probe trial on day 12 resulted from reaching the previous platform position. The latency of the probe trial is visually offset as it is not part of the training phase.

**(B)** Neither CTRL nor cKO showed significant quadrant preferences during reversal probe trial.

**(C-D)** Schaffer-collateral fEPSP initial slopes recorded from forebrain slices.

**(C)** Averaged PPF was not different between CTRL (n = 6 slices from N = 4 animals) and cKO (n = 6 slices from N = 4 animals) for all inter-stimulus intervals. Representative traces from CTRL (black) and cKO (red) shown left.

**(D)** Averaged initial fEPSP slopes recorded at stimulation intensities of 25 – 150  $\mu$ A in 25  $\mu$ A increments were not different between cKO (n = 8 slices from N = 5 animals) and CTRL (n = 8 slices from N = 5 animals). Left: Representative traces.

Statistics: Two-way ANOVA with Sidak's multiple comparison test. All bar diagrams presented as means  $\pm$  SEM.

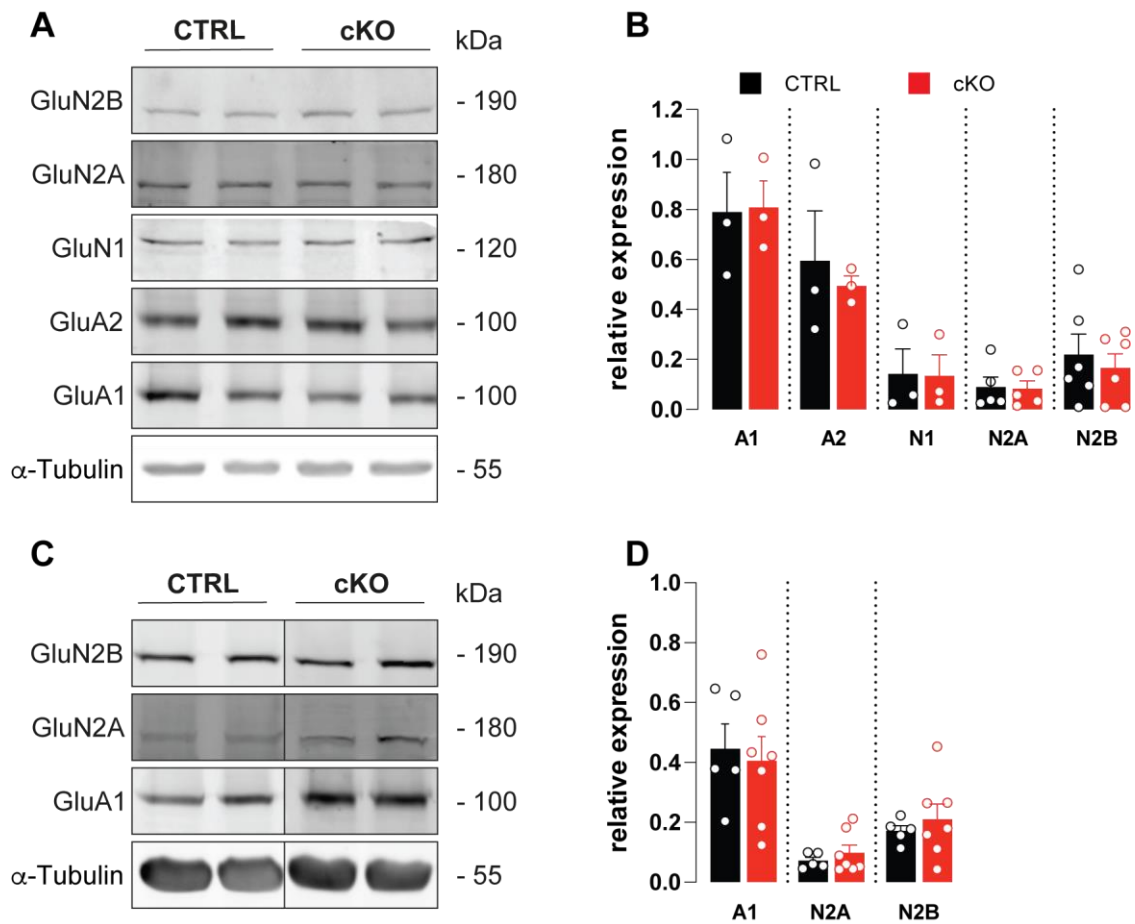

**Figure S3.** AMPAR and NMDAR subunit composition is normal in cKO under basal conditions and after MWM

(A) Hippocampal lysates from 8-12 weeks-old CTRL and cKO were used for immunodetection on Western blot membranes. No differences were detected in AMPAR (GluA1 N = 3 animals and GluA2 N = 3) and NMDAR (GluN1 N = 3, GluN2A N = 5, and GluN2B N = 6) subunit composition. Left: representative blots, right: densitometric quantification, normalized to loading control ( $\alpha$ -Tubulin) on bottom.

(B) After completion of the MWM, hippocampal lysates from CTRL and cKO were used for immunoblotting. No difference was found in AMPAR (GluA1 N = 5-7) and NMDAR (GluN2A N = 5-7, GluN2B N = 5-7) subunit composition. Representative blots on top, densitometric quantification, normalized to loading control ( $\alpha$ -Tubulin) on bottom.

Statistics: Unpaired Student's t test. All bar diagrams presented as means  $\pm$  SEM.

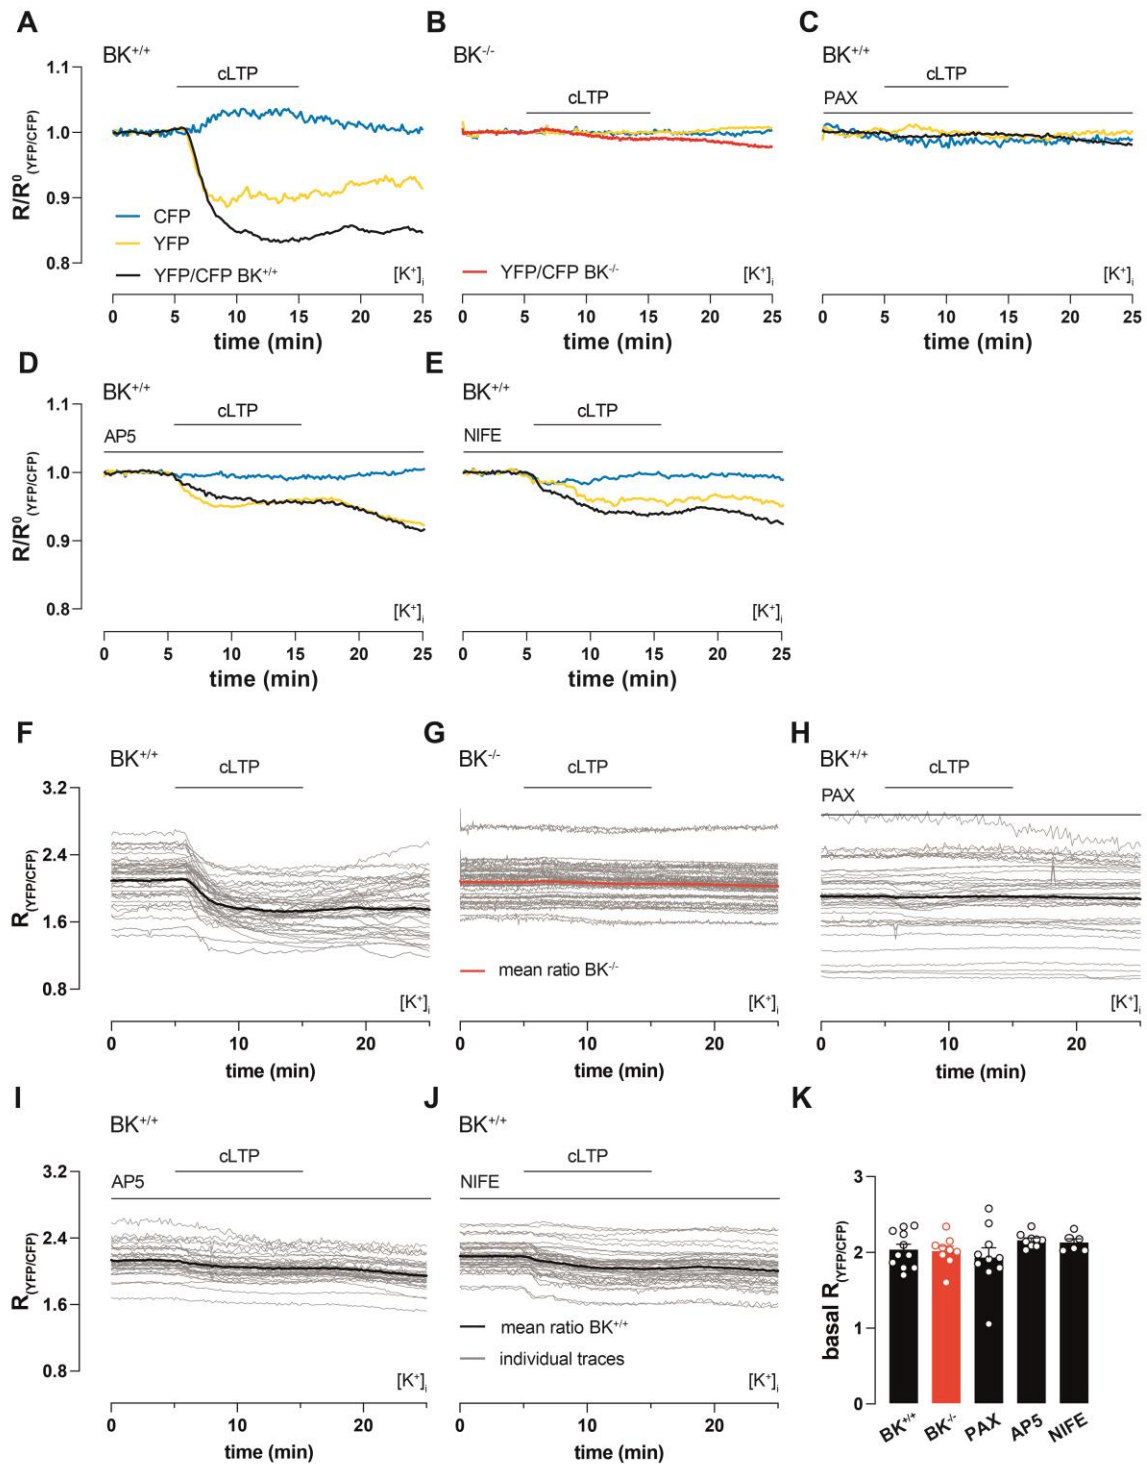

**Figure S4.** Single intensities and unnormalized data from  $[K^+]_i$  recordings

(A-E) Averaged time course of ratio (YFP/CFP) are shown in black for  $BK^{+/+}$  (A, C-E) or red for  $BK^{-/-}$  (B). Representative traces for single fluorophore intensities of YFP (yellow) and CFP (blue) from live  $K^+$  imaging in Figure 4 show antiparallel progression recorded over time for (A)  $BK^{+/+}$ , (B)  $BK^{-/-}$ , (C)  $BK^{+/+}$  with PAX, (D)  $BK^{+/+}$  with AP5 and (E)  $BK^{+/+}$  with NIFE.

**(F-K)** Data from Figure 4 C-G are shown unnormalized. 9 DIV hippocampal neuronal cultures were virally transduced at 7 DIV with the FRET-based  $K^+$  indicator (GEPII) before cLTP induction. **(K)** Comparison of the averaged first 5 minutes of measurement from **(F)**  $BK^{+/+}$  ( $n = 11$  independent experiments from a total of  $n = 54$  neurons obtained from  $N = 6$  preparations), **(G)**  $BK^{-/-}$  ( $n = 9$  independent experiments from a total of  $n = 48$  neurons obtained from  $N = 5$  preparations) and  $BK^{+/+}$  neurons inhibited by **(H)** PAX ( $n = 10$  independent experiments from a total of  $n = 43$  neurons obtained from  $N = 5$  preparations), **(I)** AP5 ( $n = 9$  independent experiments from a total of  $n = 37$  neurons obtained from  $N = 5$  preparations), and **(J)** NIFE ( $n = 6$  independent experiments from a total of  $n = 52$  neurons obtained from  $N = 4$  preparations) did not differ, indicating comparable  $[K^+]_i$  concentration. Statistics: One-way ANOVA with Tukey's multiple comparison test. All bar diagrams presented as means  $\pm$  SEM.

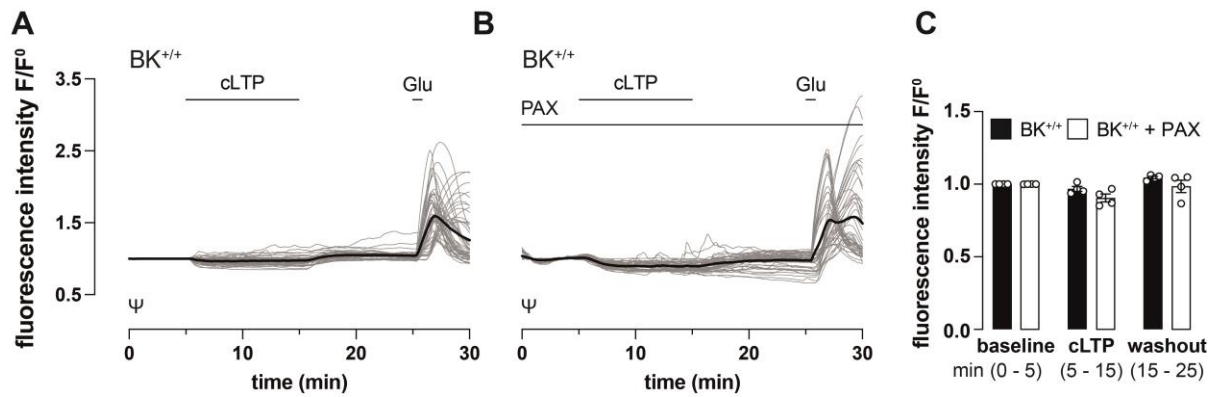

**Figure S5.** *Unchanged membrane potential during cLTP*

**(A and B)** Time course of fluorescence intensity at 493 nm in 9 DIV hippocampal neuronal cultures loaded with the potential-sensitive probe, DiBAC<sub>4</sub>(3). According to manufacturer's instruction DiBAC<sub>4</sub>(3) was present in all buffers used. Traces recorded from individual neurons from multiple experiments are plotted in grey, representative traces in black. Glutamate (20  $\mu$ M) application at the end of each measurement verified cell viability and served as positive control.

**(A)** cLTP induction via FRP did not change membrane potential neither in BK<sup>+/+</sup> nor **(B)** in BK<sup>-/-</sup> inhibited neurons via PAX (5  $\mu$ M).

**(C)** Comparison of normalized fluorescence intensity during baseline (first 5 min), cLTP (5 – 15 min) and washout (15 – 25 min) revealed comparable membrane potential between BK<sup>+/+</sup> and BK<sup>+/+</sup> with PAX before, during and after cLTP induction.

Statistics: Two-way ANOVA with Tukey's multiple comparison test. All bar diagrams presented as means  $\pm$  SEM.



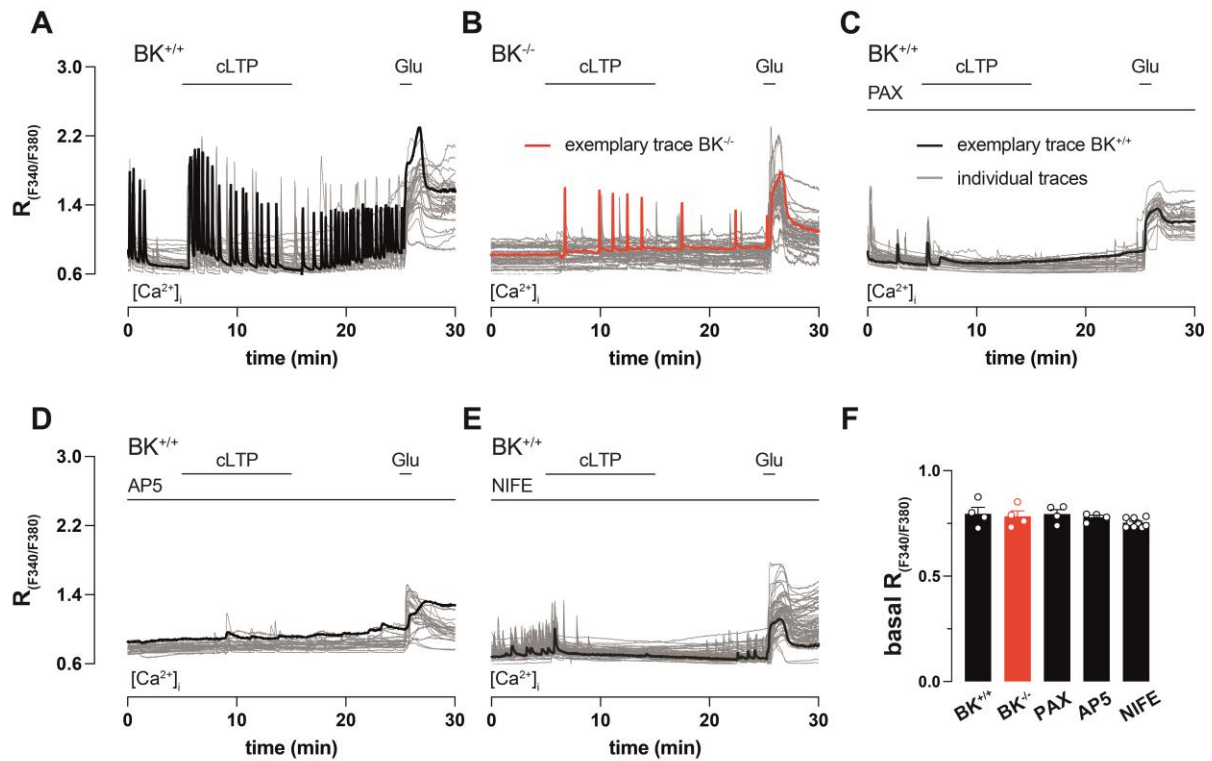

**Figure S6.** Unnormalized data from  $[Ca^{2+}]_i$  recordings

(A-E) Data from Figure 5 A-E are shown unnormalized. 9 DIV hippocampal neuronal cultures loaded with the  $Ca^{2+}$ -sensitive dye Fura-2-AM. Traces from individual neurons recorded during multiple measurements are plotted in grey, representative traces in black except for (B) which is in red. Glutamate ( $20 \mu M$ ) application at the end of each measurement verified cell viability and served as positive control.

(F) Comparison of the averaged first 5 minutes of measurement from (A)  $BK^{+/+}$  ( $n = 4$  independent experiments from a total of  $n = 31$  neurons obtained from  $N = 4$  preparations), (B)  $BK^{-/-}$  ( $n = 4$  independent experiments from a total of  $n = 35$  neurons obtained from  $N = 3$  preparations) and  $BK^{+/+}$  neurons inhibited by (C) PAX ( $n = 4$  independent experiments from a total of  $n = 29$  neurons obtained from  $N = 3$  preparations), (D) AP5 ( $n = 4$  independent experiments from a total of  $n = 29$  neurons obtained from  $N = 3$  preparations), and (E) NIFE ( $n = 4$  independent experiments from a total of  $n = 69$  neurons obtained from  $N = 5$  preparations) did not differ, indicating comparable  $[Ca^{2+}]_i$  concentration between neurons.

Statistics: One-way ANOVA with Tukey's multiple comparison test. All bar diagrams presented as means  $\pm$  SEM.

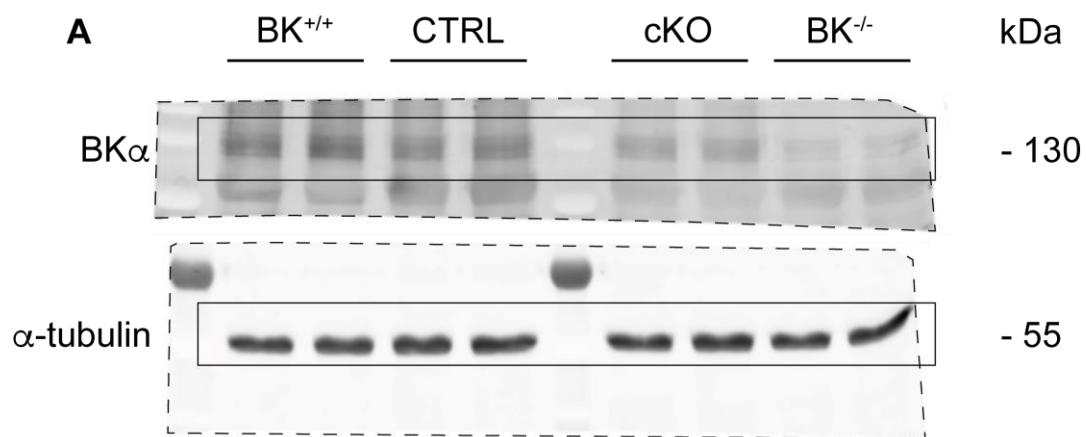

**Figure S7.** Raw blot from Figure 1A

Entire strips of Western blot membrane from Figure 1A probed with the indicated antibodies and displayed without contrast enhancement. To facilitate association to the blot shown in Figure 1, both are labeled identically.

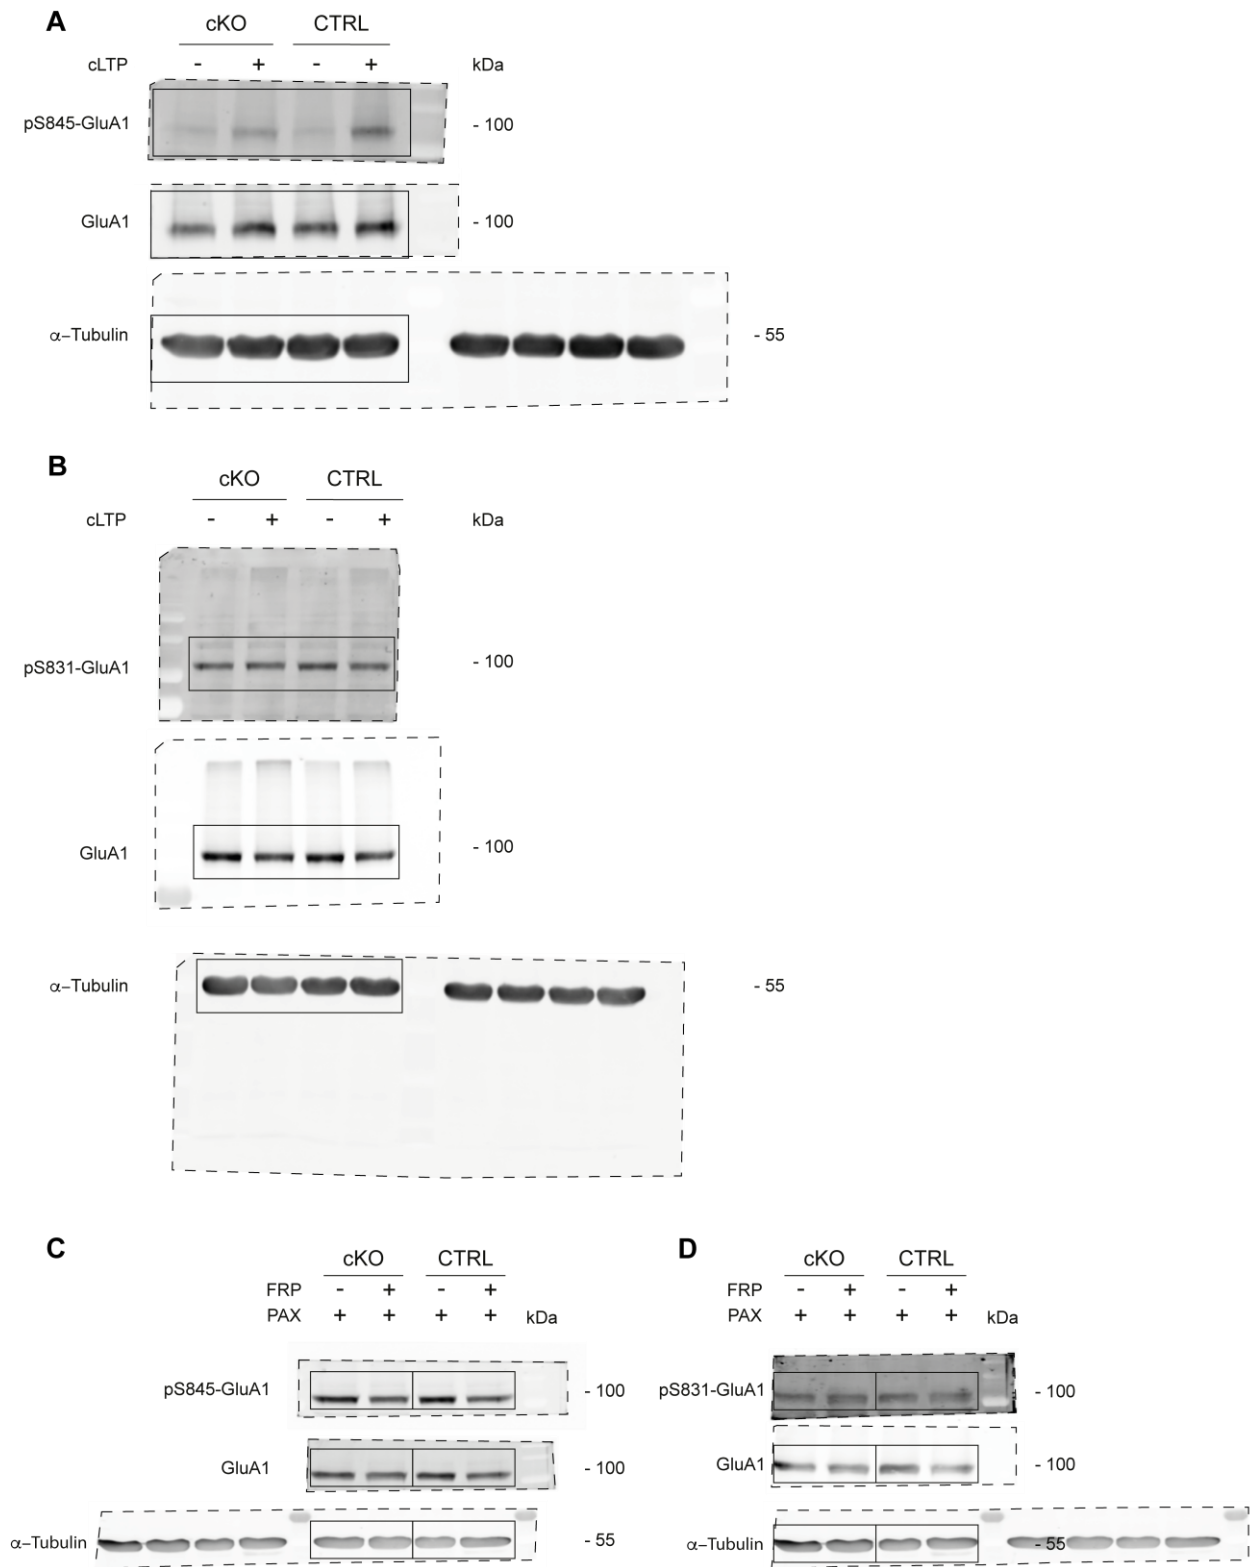

**Figure S8.** Raw blots from Figure 3

Entire strips of Western blot membranes from Figure 3 probed with the indicated antibodies and displayed without contrast enhancement. To facilitate association to the blots shown in Figure 3, panel arrangement and labelling were preserved.

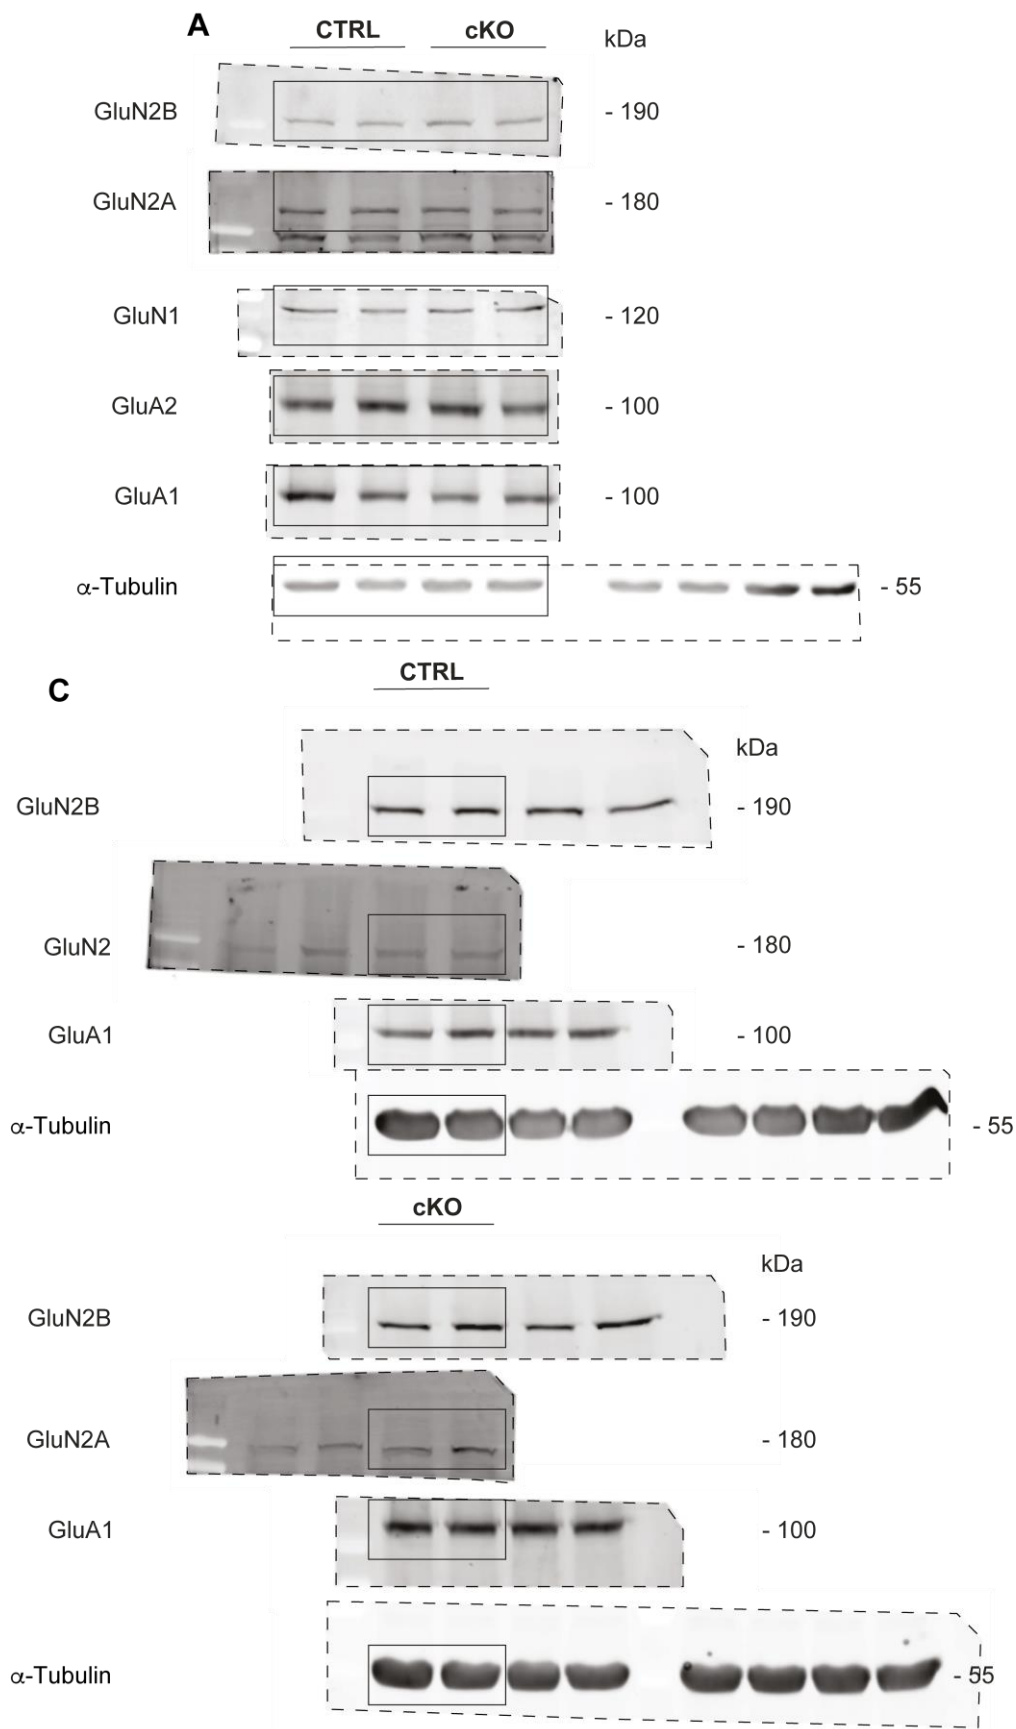

**Figure S9.** Raw blots from Figure S3

Entire strips of Western blot membranes from Figure S3 probed with the indicated antibodies and displayed without contrast enhancement. To facilitate association to the blots shown in S3, panel arrangement and labelling were preserved.
